# Supplementary material for: Rapidly Dissolving Microneedles for the Delivery of Steroid-Loaded Nanoparticles Intended for the Treatment of Inflammatory Skin Diseases
Source: MDPI journal article supplement (doi:10.3390/pharmaceutics15020526), 2023-02-04
Supplement: s1 [file s1]

## **Supplementary Materials**

### **Rapidly Dissolving Microneedles for the Delivery of Steroid-Loaded Nanoparticles Intended for the Treatment of Inflammatory Skin Diseases**

Hala Dawud and Aiman Abu Ammar \*

Department of Pharmaceutical Engineering, Azrieli College of Engineering Jerusalem,  
26 Yaakov Shreibom Street, Ramat Beit HaKerem, Jerusalem 9103501, Israel

\* Correspondence: [aimanab@jce.ac.il](mailto:aimanab@jce.ac.il); Tel.: +972-2-6591835

## Contents:

**Figure S1.** Calibration curve of DEX in distilled water containing 5% DMSO at 242 nm.

**Figure S2.** Calibration curve of DEX in PBS (pH=7.4) at 242 nm.

**Figure S3.** FTIR spectrum of Solutol HS 15.

**Figure S4.** Images of MNs loaded with blank PLGA NPs (A) before and (C) after the insertion test. (B) Representative microscopic image of holes created on the first parafilm layer.

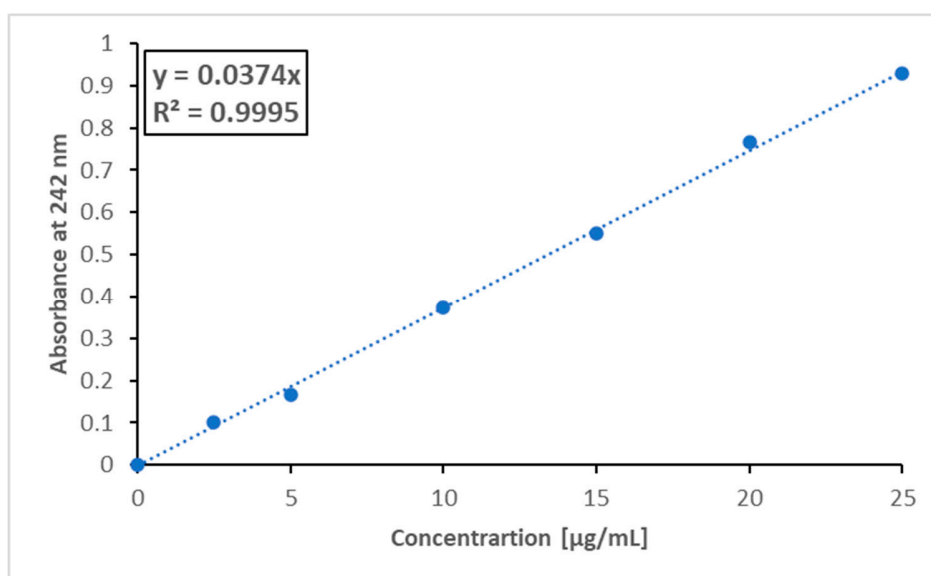

**Figure S1.** Calibration curve of DEX in distilled water containing 5% DMSO at 242 nm.

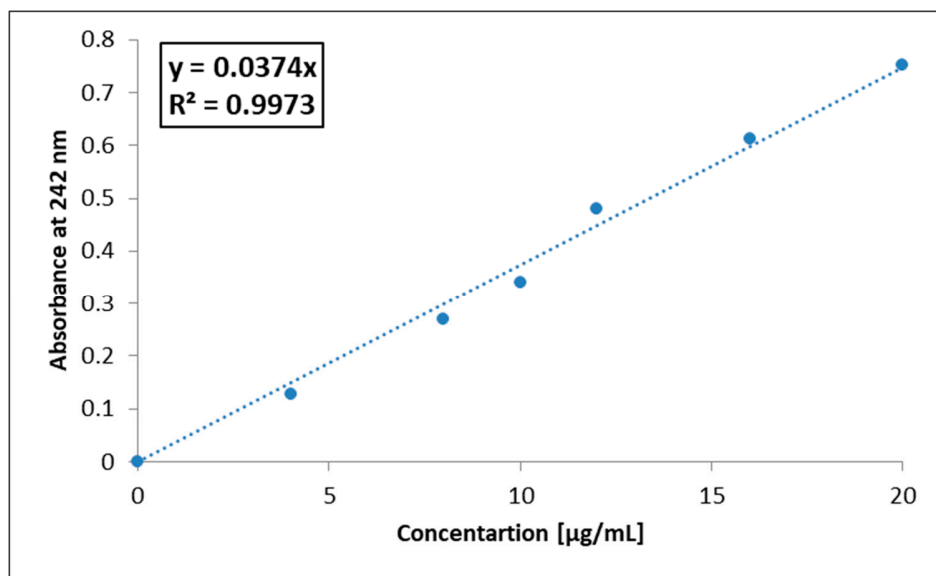

**Figure S2.** Calibration curve of DEX in PBS (pH=7.4) at 242 nm.

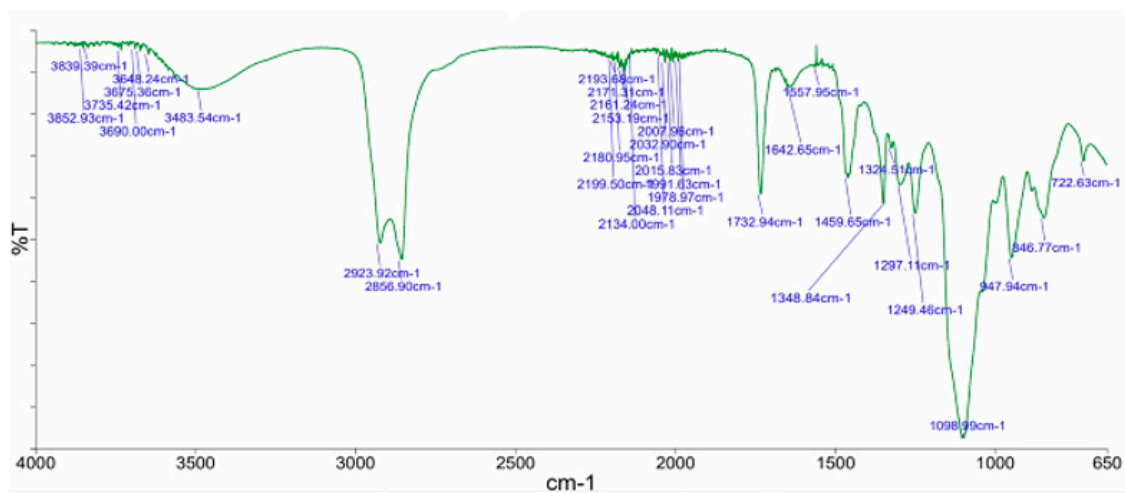

**Figure S3.** FTIR spectrum of solutol HS 15.

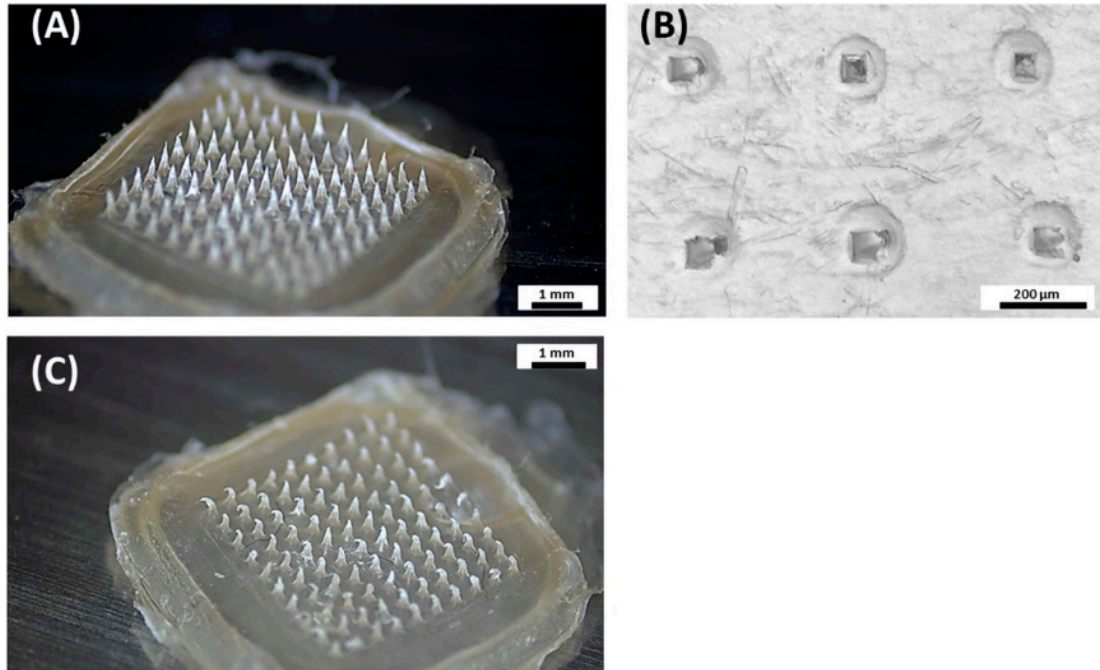

**Figure S4.** Images of MNs loaded with blank PLGA NPs (A) before and (C) after the insertion test. (B) Representative microscopic image of holes created on the first parafilm layer.
